# Supplementary material for: Early Permian Post-Collision Extensional Setting in the Southern Beishan Orogenic Belt: Evidence from the Zhangfangshan Granodiorite and the Baishantang Bimodal Volcanic Rocks
Source: MDPI journal article supplement (doi:10.3390/min13121468), 2023-11-22
Supplement: s1 [file s1]

**Table S1.** Results of U-Pb dating by zircons from the Baishangtang rhyolite and the Zhangfangshan granodiorite.

1

| Spot no.        | Th/U | Isotopic ratios                  |               |                                  |               | Ages (Ma)                        |               |                                  |               |
|-----------------|------|----------------------------------|---------------|----------------------------------|---------------|----------------------------------|---------------|----------------------------------|---------------|
|                 |      | $^{207}\text{Pb}/^{235}\text{U}$ | $\pm 1\sigma$ | $^{206}\text{Pb}/^{238}\text{U}$ | $\pm 1\sigma$ | $^{207}\text{Pb}/^{235}\text{U}$ | $\pm 1\sigma$ | $^{206}\text{Pb}/^{238}\text{U}$ | $\pm 1\sigma$ |
| <b>GQ-LW-01</b> | 1.15 | 0.30990                          | 0.00771       | 0.04318                          | 0.00053       | 274                              | 6             | 273                              | 3             |
| GQ-LW-02        | 0.61 | 0.31082                          | 0.00860       | 0.04313                          | 0.00074       | 275                              | 7             | 272                              | 5             |
| GQ-LW-03        | 0.59 | 0.47696                          | 0.00875       | 0.06323                          | 0.00065       | 396                              | 6             | 395                              | 4             |
| GQ-LW-04        | 0.69 | 0.30683                          | 0.00636       | 0.04319                          | 0.00055       | 272                              | 5             | 273                              | 3             |
| GQ-LW-05        | 0.46 | 0.30766                          | 0.00694       | 0.04309                          | 0.00060       | 272                              | 5             | 272                              | 4             |
| GQ-LW-06        | 0.69 | 0.31792                          | 0.00864       | 0.04314                          | 0.00057       | 280                              | 7             | 272                              | 4             |
| GQ-LW-07        | 0.58 | 0.48182                          | 0.01063       | 0.06323                          | 0.00074       | 399                              | 7             | 395                              | 5             |
| GQ-LW-08        | 0.95 | 0.29884                          | 0.00786       | 0.04321                          | 0.00059       | 265                              | 6             | 273                              | 4             |
| GQ-LW-09        | 1.13 | 0.31517                          | 0.00896       | 0.04323                          | 0.00066       | 278                              | 7             | 273                              | 4             |
| GQ-LW-10        | 0.94 | 0.30229                          | 0.00749       | 0.04293                          | 0.00051       | 268                              | 6             | 271                              | 3             |
| GQ-LW-11        | 0.74 | 0.31384                          | 0.00780       | 0.04304                          | 0.00061       | 277                              | 6             | 272                              | 4             |
| GQ-LW-12        | 1.03 | 0.30241                          | 0.00679       | 0.04317                          | 0.00042       | 268                              | 5             | 272                              | 3             |
| GQ-LW-13        | 0.62 | 0.30347                          | 0.00794       | 0.04325                          | 0.00055       | 269                              | 6             | 273                              | 3             |
| GQ-LW-14        | 0.68 | 0.31267                          | 0.00749       | 0.04311                          | 0.00061       | 276                              | 6             | 272                              | 4             |
| GQ-LW-15        | 0.69 | 0.30598                          | 0.00548       | 0.04322                          | 0.00047       | 271                              | 4             | 273                              | 3             |
| GQ-LW-16        | 0.47 | 0.30608                          | 0.00579       | 0.04319                          | 0.00052       | 271                              | 5             | 273                              | 3             |
| GQ-LW-17        | 0.64 | 0.30975                          | 0.00738       | 0.04310                          | 0.00045       | 274                              | 6             | 272                              | 3             |
| GQ-LW-18        | 1.11 | 0.31393                          | 0.00792       | 0.04324                          | 0.00064       | 277                              | 6             | 273                              | 4             |
| ZN-HG-01        | 0.51 | 0.33622                          | 0.00566       | 0.04659                          | 0.00057       | 294                              | 4             | 294                              | 4             |
| ZN-HG-02        | 0.44 | 0.32241                          | 0.00585       | 0.04526                          | 0.00056       | 284                              | 4             | 285                              | 3             |
| ZN-HG-03        | 0.46 | 0.33008                          | 0.00569       | 0.04575                          | 0.00057       | 290                              | 4             | 288                              | 4             |
| ZN-HG-04        | 0.57 | 0.32701                          | 0.00532       | 0.04566                          | 0.00056       | 287                              | 4             | 288                              | 3             |
| ZN-HG-05        | 0.45 | 0.33010                          | 0.00777       | 0.04613                          | 0.00059       | 290                              | 6             | 291                              | 4             |
| ZN-HG-06        | 0.65 | 0.33416                          | 0.00485       | 0.04602                          | 0.00056       | 293                              | 4             | 290                              | 3             |
| ZN-HG-07        | 0.45 | 0.32905                          | 0.00444       | 0.04571                          | 0.00056       | 289                              | 3             | 288                              | 3             |
| ZN-HG-08        | 0.48 | 0.33059                          | 0.00601       | 0.04568                          | 0.00057       | 290                              | 5             | 288                              | 4             |
| ZN-HG-09        | 0.48 | 0.33458                          | 0.00475       | 0.04719                          | 0.00058       | 293                              | 4             | 297                              | 4             |
| ZN-HG-10        | 0.56 | 0.33431                          | 0.00666       | 0.04564                          | 0.00057       | 293                              | 5             | 288                              | 4             |

|          |      |         |         |         |         |     |   |     |   |
|----------|------|---------|---------|---------|---------|-----|---|-----|---|
| ZN-HG-11 | 0.56 | 0.32335 | 0.00444 | 0.04534 | 0.00055 | 284 | 3 | 286 | 3 |
| ZN-HG-12 | 0.47 | 0.32449 | 0.00413 | 0.04507 | 0.00055 | 285 | 3 | 284 | 3 |
| ZN-HG-13 | 0.50 | 0.32302 | 0.00638 | 0.04515 | 0.00057 | 284 | 5 | 285 | 4 |
| ZN-HG-14 | 0.49 | 0.32403 | 0.00597 | 0.04559 | 0.00057 | 285 | 5 | 287 | 4 |
| ZN-HG-15 | 0.45 | 0.33681 | 0.00789 | 0.04673 | 0.00060 | 295 | 6 | 294 | 4 |

**Table S2.** Whole-rock major (wt.%) and trace element (ppm) analyses of the Zhangfangshan granodiorites and the Baishantang bimodal volcanic rocks.

|                                    | 22ZF-33     | 22ZF-30     | 22ZF-31     | 22ZF-29     | 22ZF-32     | 22ZF-34     | 17GQ-LW-01 | 17GQ-LW-02 | 17GQ-LW-03 | 17GQ-LW-04 | 17GQ-LW-05 | 17GQ-LW-06 |
|------------------------------------|-------------|-------------|-------------|-------------|-------------|-------------|------------|------------|------------|------------|------------|------------|
|                                    | granodiorit | granodiorit | granodiorit | granodiorit | granodiorit | granodiorit | rhyolite   | rhyolite   | rhyolite   | rhyolite   | rhyolite   | rhyolite   |
|                                    | e           | e           | e           | e           | e           | e           |            |            |            |            |            |            |
| SiO <sub>2</sub>                   | 64.78       | 67.12       | 66.96       | 69.14       | 69.21       | 67.58       | 75.51      | 75.87      | 75.52      | 75.57      | 75.12      | 75.57      |
| TiO <sub>2</sub>                   | 0.40        | 0.33        | 0.39        | 0.39        | 0.36        | 0.34        | 0.14       | 0.14       | 0.13       | 0.14       | 0.14       | 0.14       |
| Al <sub>2</sub> O <sub>3</sub>     | 14.58       | 13.67       | 13.55       | 13.92       | 13.97       | 14.36       | 13.30      | 13.16      | 13.35      | 13.15      | 13.53      | 13.14      |
| TFe <sub>2</sub> O <sub>3</sub>    | 3.34        | 2.81        | 3.22        | 3.47        | 2.04        | 2.72        | 1.74       | 1.53       | 1.41       | 1.66       | 1.46       | 1.65       |
| MnO                                | 0.06        | 0.05        | 0.06        | 0.08        | 0.03        | 0.05        | 0.04       | 0.03       | 0.03       | 0.03       | 0.03       | 0.04       |
| MgO                                | 1.54        | 1.24        | 1.55        | 1.68        | 0.65        | 1.30        | 0.27       | 0.30       | 0.26       | 0.28       | 0.37       | 0.27       |
| CaO                                | 3.23        | 3.32        | 3.31        | 3.80        | 2.15        | 3.11        | 0.53       | 0.61       | 0.82       | 0.67       | 0.69       | 0.72       |
| Na <sub>2</sub> O                  | 6.76        | 6.14        | 7.22        | 3.92        | 6.10        | 4.07        | 4.02       | 4.00       | 4.04       | 4.03       | 4.07       | 4.06       |
| K <sub>2</sub> O                   | 3.72        | 3.92        | 3.52        | 3.20        | 4.03        | 3.33        | 4.29       | 4.21       | 4.27       | 4.33       | 4.41       | 4.25       |
| P <sub>2</sub> O <sub>5</sub>      | 0.27        | 0.20        | 0.20        | 0.25        | 0.16        | 0.19        | 0.03       | 0.03       | 0.02       | 0.02       | 0.03       | 0.03       |
| LOI                                | 1.19        | 1.19        | 1.20        | 1.59        | 1.19        | 2.99        | 1.21       | 1.19       | 1.46       | 1.29       | 1.33       | 1.18       |
| Mg <sup>#</sup>                    | 47.70       | 46.66       | 48.85       | 48.97       | 38.56       | 48.72       | 23.72      | 27.69      | 26.90      | 25.27      | 33.58      | 24.71      |
| Na <sub>2</sub> O/K <sub>2</sub> O | 1.82        | 1.57        | 2.05        | 1.22        | 1.51        | 1.22        | 0.94       | 0.95       | 0.95       | 0.93       | 0.92       | 0.95       |
| Na <sub>2</sub> O+K <sub>2</sub> O | 10.48       | 10.06       | 10.74       | 7.12        | 10.13       | 7.41        | 8.31       | 8.21       | 8.31       | 8.36       | 8.48       | 8.30       |
| A/CNK                              | 0.69        | 0.67        | 0.62        | 0.83        | 0.76        | 0.90        | 1.09       | 1.07       | 1.05       | 1.05       | 1.06       | 1.04       |
| 10000*Ga/Al                        | 3.13        | 3.33        | 3.28        | 2.86        | 3.16        | 2.76        | 2.73       | 2.63       | 2.60       | 2.69       | 2.67       | 2.68       |
| Ba                                 | 303         | 335         | 334         | 321         | 333         | 292         | 660        | 650        | 630        | 610        | 650        | 600        |
| Rb                                 | 117.94      | 134.54      | 109.56      | 134.60      | 117.82      | 119.11      | 162.50     | 154.50     | 161.50     | 158.50     | 163.50     | 154.00     |

|    |       |       |       |       |       |       |       |       |       |       |       |       |
|----|-------|-------|-------|-------|-------|-------|-------|-------|-------|-------|-------|-------|
| Cs | 4.55  | 6.32  | 4.38  | 4.27  | 4.36  | 4.73  | 3.35  | 7.03  | 3.47  | 3.36  | 3.89  | 2.98  |
| Th | 68.21 | 45.19 | 36.92 | 21.39 | 42.36 | 22.64 | 15.55 | 14.70 | 14.25 | 14.75 | 14.50 | 14.05 |
| U  | 6.17  | 3.23  | 3.23  | 2.52  | 4.02  | 2.00  | 2.40  | 2.10  | 2.10  | 2.00  | 2.10  | 2.00  |
| Nb | 10.64 | 9.72  | 10.21 | 9.74  | 10.59 | 8.21  | 13.10 | 13.00 | 11.80 | 12.40 | 12.60 | 12.60 |
| Ta | 1.25  | 1.19  | 1.60  | 1.26  | 1.30  | 0.92  | 1.11  | 1.08  | 1.05  | 1.08  | 1.08  | 1.11  |
| K  | 30863 | 32512 | 29199 | 26570 | 33494 | 27673 | 35300 | 34100 | 33600 | 34400 | 37100 | 35300 |
| La | 33.3  | 34.0  | 36.8  | 26.4  | 27.5  | 22.3  | 34.0  | 31.9  | 27.2  | 31.3  | 32.4  | 27.5  |
| Ce | 82    | 78    | 85    | 58    | 66    | 49    | 73    | 70    | 61    | 68    | 70    | 61    |
| Pr | 9.6   | 9.5   | 10.0  | 6.8   | 8.6   | 6.1   | 8.7   | 8.3   | 7.3   | 8.1   | 8.4   | 7.4   |
| Pb | 21.4  | 23.2  | 18.8  | 22.8  | 20.8  | 19.2  | 16.8  | 15.2  | 15.1  | 14.2  | 14.0  | 14.6  |
| Sr | 190   | 155   | 170   | 158   | 186   | 186   | 76    | 70    | 73    | 70    | 77    | 72    |
| Nd | 36.8  | 36.3  | 37.0  | 24.5  | 34.9  | 23.4  | 32.4  | 31.4  | 27.7  | 30.5  | 31.1  | 27.9  |
| Zr | 390   | 292   | 284   | 153   | 361   | 271   | 75    | 70    | 69    | 69    | 72    | 71    |
| Hf | 10.88 | 7.90  | 7.28  | 4.41  | 9.41  | 7.12  | 3.40  | 3.30  | 3.30  | 3.10  | 3.30  | 3.30  |
| P  | 1157  | 863   | 865   | 1109  | 701   | 827   | 120   | 130   | 110   | 120   | 120   | 130   |
| Sm | 8.95  | 8.95  | 8.07  | 5.28  | 8.64  | 5.57  | 6.77  | 6.77  | 5.92  | 6.33  | 6.43  | 6.11  |
| Ti | 2413  | 1958  | 2321  | 2311  | 2140  | 2023  | 920   | 900   | 770   | 860   | 880   | 880   |
| Eu | 0.93  | 0.79  | 0.88  | 0.80  | 0.97  | 0.78  | 1.07  | 1.08  | 0.99  | 1.01  | 1.00  | 0.95  |
| Gd | 8.95  | 8.84  | 8.10  | 4.88  | 9.07  | 5.65  | 6.53  | 6.34  | 5.83  | 6.16  | 6.12  | 5.93  |
| Tb | 1.56  | 1.50  | 1.32  | 0.81  | 1.54  | 0.97  | 1.04  | 1.02  | 0.93  | 0.99  | 0.97  | 0.99  |
| Dy | 10.18 | 9.63  | 8.27  | 5.13  | 9.84  | 6.30  | 6.64  | 6.36  | 5.88  | 6.06  | 5.94  | 6.02  |
| Y  | 62.2  | 58.3  | 50.3  | 33.8  | 59.1  | 39.1  | 35.1  | 33.9  | 31.8  | 32.4  | 32.5  | 32.6  |
| Er | 6.44  | 5.98  | 5.00  | 3.35  | 5.90  | 4.09  | 4.15  | 3.89  | 3.69  | 3.69  | 3.68  | 3.79  |
| Yb | 6.83  | 6.18  | 5.12  | 3.60  | 5.82  | 4.26  | 4.04  | 3.85  | 3.72  | 3.67  | 3.70  | 3.81  |
| Lu | 0.98  | 0.85  | 0.71  | 0.50  | 0.84  | 0.63  | 0.63  | 0.59  | 0.59  | 0.58  | 0.58  | 0.60  |
| Ho | 2.14  | 2.05  | 1.71  | 1.11  | 2.02  | 1.32  | 1.36  | 1.27  | 1.23  | 1.27  | 1.23  | 1.27  |
| Tm | 1.04  | 0.91  | 0.76  | 0.54  | 0.91  | 0.63  | 0.62  | 0.58  | 0.56  | 0.56  | 0.55  | 0.57  |
| Ga | 24.2  | 24.1  | 23.6  | 21.1  | 23.3  | 21.0  | 19.2  | 18.4  | 18.4  | 18.8  | 19.2  | 18.7  |
| Cr | 31.29 | 21.51 | 24.75 | 17.76 | 30.81 | 25.22 | 2.00  | 2.00  | 1.00  | 2.00  | 8.00  | 3.00  |
| Ni | 15.00 | 14.21 | 12.16 | 8.33  | 13.62 | 11.22 | 1.20  | 1.20  | 2.20  | 1.50  | 4.40  | 1.40  |
| Co | 8.92  | 6.78  | 8.12  | 5.71  | 9.05  | 6.39  | 1.60  | 1.30  | 1.20  | 1.60  | 1.80  | 1.70  |

|                      |        |        |        |        |        |        |        |        |        |        |        |        |
|----------------------|--------|--------|--------|--------|--------|--------|--------|--------|--------|--------|--------|--------|
| ΣREE                 | 209.23 | 203.47 | 209.06 | 142.08 | 182.62 | 131.49 | 181.13 | 172.92 | 151.99 | 167.71 | 171.97 | 154.14 |
| LREE                 | 171.12 | 167.53 | 178.07 | 122.17 | 146.68 | 107.64 | 156.12 | 149.02 | 129.56 | 144.73 | 149.20 | 131.16 |
| HREE                 | 38.12  | 35.95  | 30.99  | 19.91  | 35.95  | 23.85  | 25.01  | 23.90  | 22.43  | 22.98  | 22.77  | 22.98  |
| LREE/HREE            | 4.49   | 4.66   | 5.75   | 6.14   | 4.08   | 4.51   | 6.24   | 6.24   | 5.78   | 6.30   | 6.55   | 5.71   |
| (La/Yb) <sub>N</sub> | 3.50   | 3.94   | 5.16   | 5.27   | 3.39   | 3.75   | 6.04   | 5.94   | 5.24   | 6.12   | 6.28   | 5.18   |
| (La/Sm) <sub>N</sub> | 2.40   | 2.45   | 2.95   | 3.23   | 2.06   | 2.59   | 3.24   | 3.04   | 2.97   | 3.19   | 3.25   | 2.91   |
| (Gd/Yb) <sub>N</sub> | 1.08   | 1.18   | 1.31   | 1.12   | 1.29   | 1.10   | 1.34   | 1.36   | 1.30   | 1.39   | 1.37   | 1.29   |
| δEu                  | 0.32   | 0.27   | 0.33   | 0.48   | 0.33   | 0.42   | 0.49   | 0.50   | 0.52   | 0.49   | 0.49   | 0.48   |
| δCe                  | 1.12   | 1.06   | 1.09   | 1.06   | 1.05   | 1.04   | 1.04   | 1.05   | 1.06   | 1.04   | 1.04   | 1.05   |
| Zr+Nb+Ce+Y           | 544.83 | 438.00 | 429.29 | 254.47 | 496.38 | 368.17 | 196.00 | 186.20 | 173.40 | 181.40 | 187.10 | 177.10 |

$$^{\text{T}}\text{FeO} = 0.8998 \cdot ^{\text{T}}\text{Fe}_2\text{O}_3; \text{Mg}^{\#} = 100 \cdot (\text{MgO}/40.3044) / (\text{MgO}/40.3044 + ^{\text{T}}\text{FeO}/71.844).$$

**Table S2.** (continued).

|                                             | 17GQ-XW-02        | 17GQ-XW-03        | 17GQ-XW-04        | 17GQ-XW-05        | 17GQ-XW-06        |
|---------------------------------------------|-------------------|-------------------|-------------------|-------------------|-------------------|
|                                             | basaltic andesite |
| SiO <sub>2</sub>                            | 55.94             | 63.14             | 61.71             | 57.60             | 54.66             |
| TiO <sub>2</sub>                            | 1.80              | 1.28              | 1.40              | 1.69              | 1.87              |
| Al <sub>2</sub> O <sub>3</sub>              | 16.12             | 14.36             | 14.39             | 15.27             | 16.13             |
| <sup>T</sup> Fe <sub>2</sub> O <sub>3</sub> | 10.17             | 7.97              | 8.81              | 9.84              | 10.71             |
| MnO                                         | 0.19              | 0.17              | 0.17              | 0.17              | 0.18              |
| MgO                                         | 4.13              | 3.47              | 3.79              | 3.97              | 4.26              |
| CaO                                         | 5.13              | 3.78              | 4.43              | 5.21              | 5.70              |
| Na <sub>2</sub> O                           | 4.32              | 3.59              | 3.25              | 4.07              | 4.30              |
| K <sub>2</sub> O                            | 1.26              | 1.59              | 1.38              | 1.26              | 1.26              |
| P <sub>2</sub> O <sub>5</sub>               | 0.54              | 0.40              | 0.41              | 0.50              | 0.55              |
| LOI                                         | 2.55              | 2.41              | 2.49              | 2.28              | 2.23              |
| Mg <sup>#</sup>                             | 44.61             | 46.30             | 46.00             | 44.41             | 44.08             |
| Na <sub>2</sub> O/K <sub>2</sub> O          | 3.43              | 2.26              | 2.37              | 3.23              | 3.41              |
| Na <sub>2</sub> O+K <sub>2</sub> O          | 5.58              | 5.18              | 4.63              | 5.33              | 5.56              |
| Ba                                          | 650               | 590               | 550               | 590               | 620               |

|    |       |       |       |       |       |
|----|-------|-------|-------|-------|-------|
| Rb | 57.90 | 68.80 | 54.80 | 34.80 | 42.70 |
| Cs | 2.84  | 2.65  | 2.53  | 2.76  | 2.88  |
| Th | 5.35  | 8.87  | 6.22  | 4.27  | 3.74  |
| U  | 3.90  | 3.00  | 2.50  | 2.70  | 2.90  |
| Nb | 9.20  | 11.50 | 10.20 | 9.30  | 8.30  |
| Ta | 0.65  | 0.81  | 0.72  | 0.65  | 0.57  |
| K  | 9900  | 12100 | 10400 | 8900  | 9500  |
| La | 21.4  | 28.3  | 25.5  | 17.4  | 17.6  |
| Ce | 50    | 61    | 55    | 42    | 43    |
| Pr | 6.6   | 7.6   | 7.0   | 5.6   | 5.9   |
| Pb | 8.9   | 10.6  | 10.1  | 9.2   | 8.2   |
| Sr | 622   | 382   | 340   | 503   | 557   |
| Nd | 27.9  | 29.5  | 27.6  | 23.7  | 26.0  |
| Zr | 258   | 192   | 214   | 180   | 203   |
| Hf | 6.60  | 5.50  | 5.30  | 4.70  | 5.00  |
| P  | 2310  | 1700  | 1770  | 2070  | 2370  |
| Sm | 6.56  | 6.22  | 6.04  | 5.63  | 6.41  |
| Ti | 10450 | 7310  | 7880  | 9030  | 10550 |
| Eu | 2.24  | 1.91  | 1.90  | 1.91  | 2.19  |
| Gd | 7.47  | 6.45  | 6.41  | 6.44  | 7.10  |
| Tb | 1.17  | 1.00  | 1.01  | 1.03  | 1.11  |
| Dy | 7.24  | 6.00  | 6.19  | 6.37  | 6.80  |
| Y  | 39.5  | 32.6  | 38.9  | 33.5  | 37.6  |
| Er | 4.18  | 3.43  | 3.52  | 3.53  | 3.87  |
| Yb | 3.70  | 3.13  | 3.10  | 3.05  | 3.28  |
| Lu | 0.57  | 0.48  | 0.48  | 0.46  | 0.49  |
| Ho | 1.47  | 1.19  | 1.27  | 1.27  | 1.39  |
| Tm | 0.59  | 0.50  | 0.49  | 0.48  | 0.54  |
| Ga | 21.4  | 18.8  | 19.7  | 20.2  | 21.2  |
| Cr | 49.00 | 45.00 | 45.00 | 43.00 | 46.00 |
| Ni | 16.00 | 18.30 | 19.00 | 15.40 | 14.20 |

|                      |        |        |        |        |        |
|----------------------|--------|--------|--------|--------|--------|
| Co                   | 26.00  | 20.20  | 21.80  | 25.10  | 27.90  |
| ΣREE                 | 140.95 | 156.62 | 145.69 | 118.35 | 125.15 |
| LREE                 | 114.56 | 134.44 | 123.22 | 95.72  | 100.57 |
| HREE                 | 26.39  | 22.18  | 22.47  | 22.63  | 24.58  |
| LREE/HREE            | 4.34   | 6.06   | 5.48   | 4.23   | 4.09   |
| (La/Yb) <sub>N</sub> | 4.15   | 6.49   | 5.90   | 4.09   | 3.85   |
| (La/Sm) <sub>N</sub> | 2.11   | 2.94   | 2.73   | 2.00   | 1.77   |
| (Gd/Yb) <sub>N</sub> | 1.67   | 1.70   | 1.71   | 1.75   | 1.79   |
| δEu                  | 0.98   | 0.92   | 0.93   | 0.97   | 0.99   |
| δCe                  | 1.03   | 1.02   | 1.01   | 1.03   | 1.03   |

<sup>T</sup>FeO=0.8998\*<sup>T</sup>Fe<sub>2</sub>O<sub>3</sub>; Mg<sup>#</sup>=100\*(MgO/40.3044)/(MgO/40.3044+<sup>T</sup>FeO/71.844).

6

7

**Table S3.** Whole-rock Nd-Hf isotopic data for the Baishantang bimodal volcanic rocks.

8

| Sample    | Sm<br>(ppm)                       | Nd<br>(ppm)                       | $^{147}\text{Sm}/^{144}\text{Nd}$ | $^{143}\text{Nd}/^{144}\text{Nd}$ | $(^{143}\text{Nd}/^{144}\text{Nd})_i$ | $\epsilon_{\text{Nd}}(t)$ | fSm/Nd | $T_{\text{DM2}}$ (Ma) |
|-----------|-----------------------------------|-----------------------------------|-----------------------------------|-----------------------------------|---------------------------------------|---------------------------|--------|-----------------------|
| 17GQ-XW-4 | 6.04                              | 27.6                              | 0.13224                           | 0.512381                          | 0.512146                              | -2.8                      | -0.33  | 1267                  |
| 17GQ-XW-5 | 5.63                              | 23.7                              | 0.14354                           | 0.512522                          | 0.512266                              | -0.4                      | -0.27  | 1075                  |
| 17GQ-XW-6 | 6.41                              | 26.0                              | 0.14897                           | 0.512470                          | 0.512205                              | -1.6                      | -0.24  | 1173                  |
| 17GQ-LW-4 | 6.33                              | 30.5                              | 0.12541                           | 0.512264                          | 0.512041                              | -4.8                      | -0.36  | 1433                  |
| 17GQ-LW-5 | 6.43                              | 31.1                              | 0.12493                           | 0.512252                          | 0.512030                              | -5.0                      | -0.36  | 1451                  |
| 17GQ-LW-6 | 6.11                              | 27.9                              | 0.13233                           | 0.512259                          | 0.512023                              | -5.2                      | -0.33  | 1460                  |
| Sample    | $^{176}\text{Lu}/^{177}\text{Hf}$ | $^{176}\text{Lu}/^{177}\text{Hf}$ | Lu<br>(ppm)                       | Hf<br>(ppm)                       | $(^{176}\text{Hf}/^{177}\text{Hf})_i$ | $\epsilon_{\text{Hf}}(t)$ | fLu/Hf | $T_{\text{DM2}}$ (Ma) |
| 17GQ-XW-4 | 0.012984                          | 0.282721                          | 0.48                              | 5.30                              | 0.282655                              | 1.8                       | -0.61  | 1175                  |
| 17GQ-XW-5 | 0.014032                          | 0.282789                          | 0.46                              | 4.70                              | 0.282717                              | 4.1                       | -0.58  | 1034                  |
| 17GQ-XW-6 | 0.014050                          | 0.282831                          | 0.49                              | 5.00                              | 0.282759                              | 5.5                       | -0.58  | 940                   |
| 17GQ-LW-4 | 0.026824                          | 0.282679                          | 0.58                              | 3.10                              | 0.282542                              | -2.2                      | -0.19  | 1427                  |
| 17GQ-LW-5 | 0.025198                          | 0.282674                          | 0.58                              | 3.30                              | 0.282546                              | -2.0                      | -0.24  | 1418                  |
| 17GQ-LW-6 | 0.026067                          | 0.282682                          | 0.60                              | 3.30                              | 0.282549                              | -1.9                      | -0.21  | 1411                  |

$\epsilon_{\text{Nd}} = [(^{143}\text{Nd}/^{144}\text{Nd})_s / (^{143}\text{Nd}/^{144}\text{Nd})_{\text{CHUR}} - 1] \times 10000$ ,  $f_{\text{Sm}/\text{Nd}} = (^{147}\text{Sm}/^{144}\text{Nd})_s / (^{147}\text{Sm}/^{144}\text{Nd})_{\text{CHUR}} - 1$ ;  $(^{143}\text{Nd}/^{144}\text{Nd})_{\text{CHUR}} = 0.512638$ ,  $(^{147}\text{Sm}/^{144}\text{Nd})_{\text{CHUR}} = 0.1967$ ,  
 $T_{\text{DM1}} = 1/\lambda \times \ln\{1 + [(^{143}\text{Nd}/^{144}\text{Nd})_s - 0.51315] / [(^{147}\text{Sm}/^{144}\text{Nd}) - 0.2137]\}$ ,  $\lambda_{\text{Sm}} = 6.54 \times 10^{-12}$ ;  $\epsilon_{\text{Hf}} = [(^{176}\text{Hf}/^{177}\text{Hf})_s / (^{176}\text{Hf}/^{177}\text{Hf})_{\text{CHUR}} - 1] \times 10000$ ,  $T_{\text{DM1}} = 1/\lambda \times \ln\{1$   
 $+ [(^{176}\text{Hf}/^{177}\text{Hf})_s - (^{176}\text{Hf}/^{177}\text{Hf})_{\text{DM}}] / [(^{176}\text{Lu}/^{177}\text{Hf})_s - (^{176}\text{Lu}/^{177}\text{Hf})_{\text{DM}}]\}$ ,  $f_{\text{Lu}/\text{Hf}} = (^{176}\text{Lu}/^{177}\text{Hf})_s / (^{176}\text{Lu}/^{177}\text{Hf})_{\text{CHUR}} - 1$ .  $(^{176}\text{Hf}/^{177}\text{Hf})_{\text{CHUR}} = 0.28277$ ,  $(^{176}\text{Lu}/^{177}\text{Hf})_{\text{CHUR}} =$   
 $0.0332$ ,  $(^{176}\text{Lu}/^{177}\text{Hf})_{\text{DM}} = 0.28235$ ,  $(^{176}\text{Lu}/^{177}\text{Hf})_{\text{DM}} = 0.0384$ ,  $\lambda_{\text{Lu}} = 1.867 \times 10^{-11}$ ,  $s$  = content of sample,  $t$  = crystallization age.

9

10

11

12
